# Supplementary material
Source: MDPI journal article supplement (https://www.mdpi.com/1996-1073/16/20/7201)
Supplement: s1 [file s1 › energies-2645216-supplementary.pdf]

# Selective Catalytic Hydrogenation of Vegetable Oils over Copper-Based Catalysts Supported on Amorphous Silica

## Supplementary information

### 1 BET Surface analysis

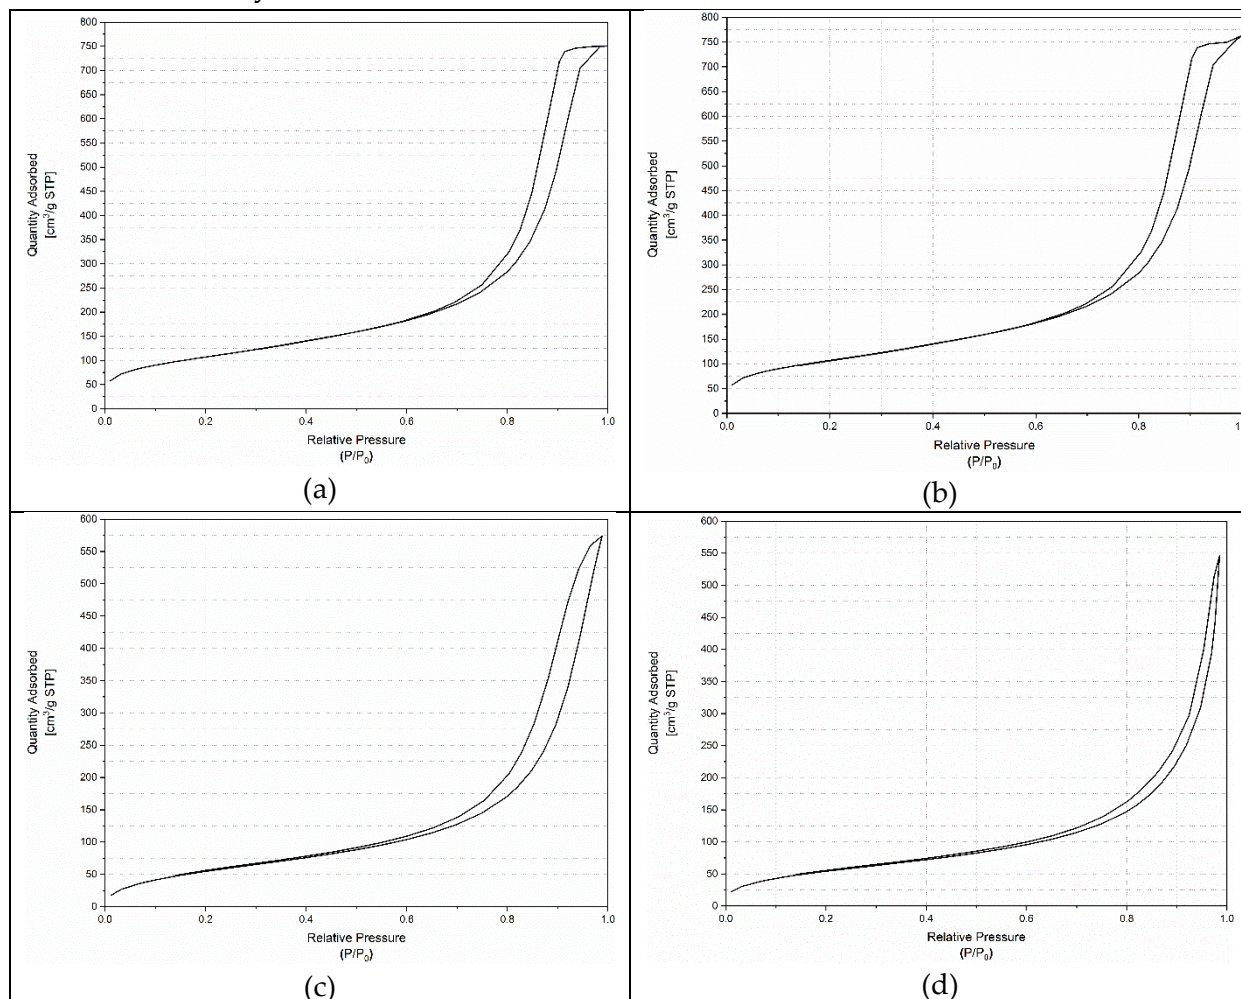

**Figure S1:** Adsorption and desorption curves of nitrogen of: (a) Cu<sub>5</sub>SiO<sub>2</sub>HP; (b) reduced Cu<sub>10</sub>SiO<sub>2</sub>HP; (c) Cu<sub>5</sub>SiO<sub>2</sub>AE; (d) reduced Cu<sub>10</sub>SiO<sub>2</sub>AE.

## 2 XPS survey of Cu 10% wt. samples.

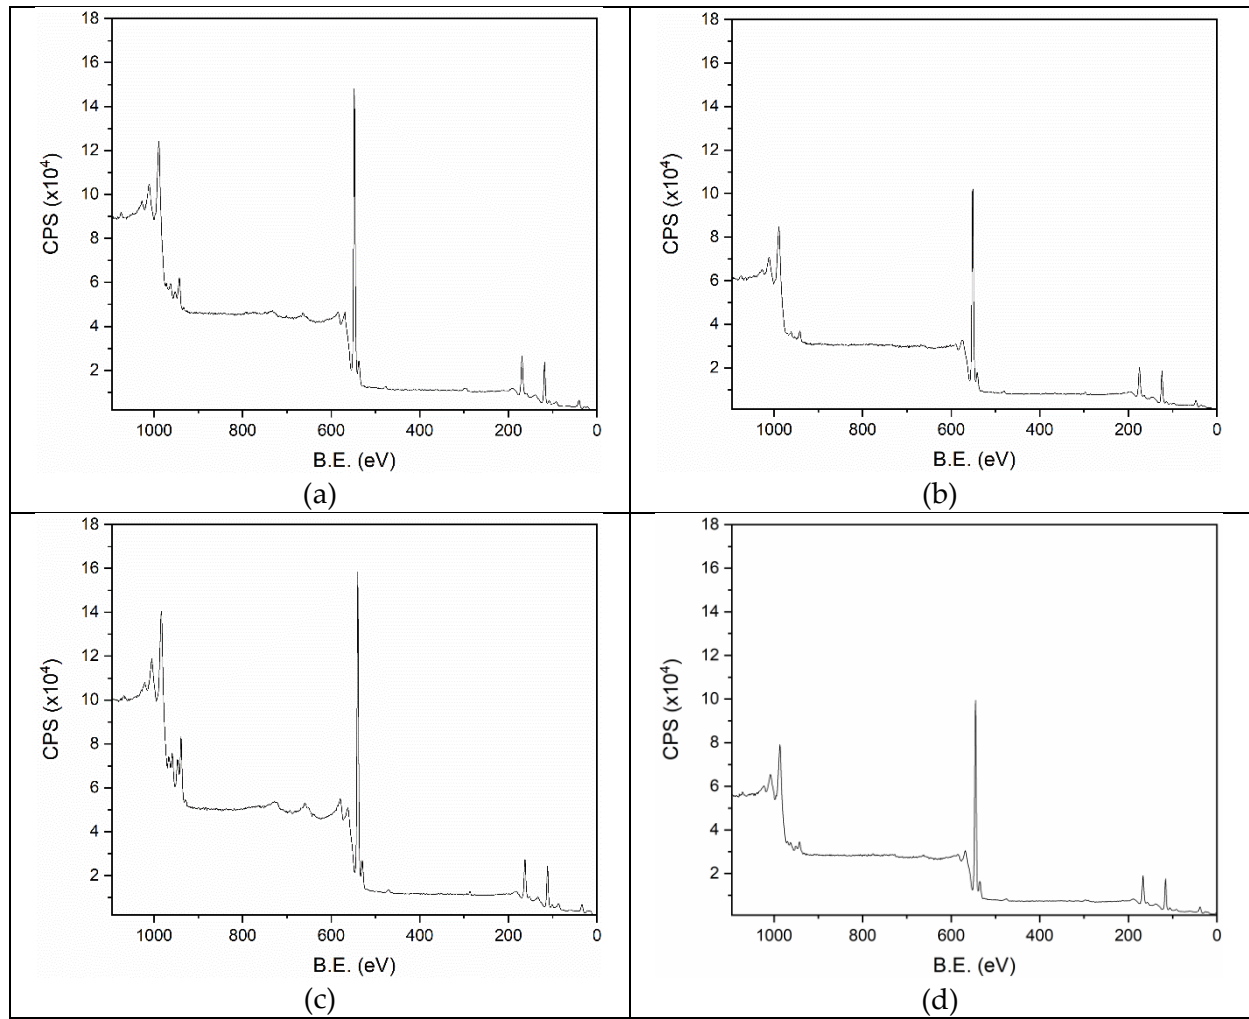

Figure S2: XPS survey data of: (a) Cu10SiO<sub>2</sub>HP; (b) reduced Cu10SiO<sub>2</sub>HPR; (c) Cu10SiO<sub>2</sub>AE; (d) reduced Cu10SiO<sub>2</sub>AER.

## 3 EDAX composition table.

Table S1: EDAX analysis for samples with 10% content of Cu, Oxygen was calculated stoichiometrically.

| Sample                   | Cu At%           | Si At%           | O At%            |
|--------------------------|------------------|------------------|------------------|
| Cu10SiO <sub>2</sub> HP  | 12.44 $\pm$ 3.20 | 40.96 $\pm$ 2.64 | 46.6 $\pm$ 1.64  |
| Cu10SiO <sub>2</sub> AE  | 9.81 $\pm$ 2.43  | 44.52 $\pm$ 2.22 | 45.67 $\pm$ 2.47 |
| Cu10SiO <sub>2</sub> HPR | 12.67 $\pm$ 2.94 | 38.85 $\pm$ 2.75 | 48.48 $\pm$ 1.1  |
| Cu10SiO <sub>2</sub> AER | 8.20 $\pm$ 2.61  | 42.1 $\pm$ 2.12  | 48.6 $\pm$ 1.52  |
